# Supplementary material for: Cooperative and Independent Functions of the miR-23a~27a~24-2 Cluster in Bovine Adipocyte Adipogenesis
Source: PubMed Central journal article supplement (PMC6321175; doi:10.3390/ijms19123957), 2018-12-09
Supplement: ijms-19-03957-s001.pdf [file ijms-19-03957-s001.pdf]

**Table S1.** Information of the oligonucleotides of miRNA agomir.

| RNA Oligo       | Sense strand (5'-3')   | Antisense strand (5'-3') | Purification | Modification |
|-----------------|------------------------|--------------------------|--------------|--------------|
| miR-23a agomir  | AUCACAUUGCCAGGGAUUUCCA | GAAAUCCCUGGCAAUGUGAUUU   | HPLC         | 2'-OMe       |
| miR-27a agomir  | UUCACAGUGGCUAAGUCCG    | GAACUUAGCCACUGUGAAUU     | HPLC         | 2'-OMe       |
| miR-24-2 agomir | UGGCUCAGUUCAGCAGGAACAG | GUUCCUGCUGAACUGAGCCAUU   | HPLC         | 2'-OMe       |
| Agomir NC       | UUCUCCGAACGUGUCACGUTT  | ACGUGACACGUUCGGAGAATT    | HPLC         | 2'-OMe       |

**Table S2.** Information of the oligonucleotides of miRNA antagomir.

| RNA Oligo          | 5'-3' sequence         | Purification | Modification |
|--------------------|------------------------|--------------|--------------|
| miR-23a antagomir  | UGGAAAUCCCUGGCAAUGUGAU | HPLC         | 2'-OMe       |
| miR-27a antagomir  | CGGAACUUAGCCACUGUGAA   | HPLC         | 2'-OMe       |
| miR-24-2 antagomir | CUGUCCUGCUGAACUGAGCCA  | HPLC         | 2'-OMe       |
| Antagomir NC       | CAGUACUUUUGUGUAGUACAA  | HPLC         | 2'-OMe       |

**Table S3.** Information of the oligonucleotides of siRNA.

| RNA Oligo      | Sense strand (5'-3')  | Antisense strand (5'-3') | Purification |
|----------------|-----------------------|--------------------------|--------------|
| si-DCN         | GCUGAAGAGCUCAGGCAUUTT | AAUGCCUGAGCUCUUCAGCTT    | HPLC         |
| si-GPAM        | GCUAGCAAGUCCUGUGCUATT | UAGCACAGGACUUGCUAGCTT    | HPLC         |
| si-DGAT2       | GCAAGAAGUUCCUGGCAUTT  | AUGCCAGGGAACUUCUUGCTT    | HPLC         |
| si-G6PD        | CCUGCGUCAUUCUCACCUUTT | AAGGUGAGAAUGACGCAGGTT    | HPLC         |
| si-LPL         | CCACGAACGUUCCGUUCAUTT | AUGAACGGAACGUUCGUGGTT    | HPLC         |
| si-FGF11-267bp | GCUUUAAGGAGUGCGUCUUTT | AAGACGCACUCCUAAAAGCTT    | HPLC         |
| si-FGF11-401bp | GGAAAUGGUCCUGGCUGAUTT | AUCAGCCAGGACCAUUUCCTT    | HPLC         |
| si-NC          | GGAGUUGCCGUCGUAAGAUTT | AUCUUACGACGGCAACUCCTT    | HPLC         |

**Table S4.** Summary information of the genes used for qRT-PCR in this study.

| Gene   | GenBank Transcript ID              | Purpose         | Forward primer sequence (5'-3') | Reverse primer sequence (5'-3') | Product size |
|--------|------------------------------------|-----------------|---------------------------------|---------------------------------|--------------|
| GAPDH  | NM_001034034 ( <i>Bos taurus</i> ) | Gene expression | AGTTCAACGGCACAGTCAAGG           | ACCACATACTCAGCACCAGCA           | 124bp        |
| PPARG  | NM_181024 ( <i>Bos taurus</i> )    | Gene expression | GACCACTCCCATGCCTTTGA            | AACCATCGGGTCAGCTCTTG            | 108bp        |
| CEBPA  | NM_176784 ( <i>Bos taurus</i> )    | Gene expression | GCCTTCAACGACGAGTTCCT            | CGGGTAGTCAAAGTCGTTGC            | 108bp        |
| SREBP1 | NM_001113302 ( <i>Bos taurus</i> ) | Gene expression | CGAGCCACCCTTCAACGAA             | AGCATGTCTTCTATGTCGGTCA          | 93bp         |
| ATP5F1 | NM_001038501 ( <i>Bos taurus</i> ) | Gene expression | TGTAACAGGACCCTATGTGCTTG         | TCCCAACAGAAGCACCATA             | 150bp        |
| DCN    | NM_173906 ( <i>Bos taurus</i> )    | Gene expression | TCGTTCGTAGAACTTGGCACC           | CAGCAATGCGGATGTAGGAG            | 96bp         |
| GPAM   | NM_001012282 ( <i>Bos taurus</i> ) | Gene expression | AGCATTGGTCGGTGTAAGCA            | AGACGGGATACTGGGGTTGA            | 189bp        |
| DGAT2  | NM_205793 ( <i>Bos taurus</i> )    | Gene expression | GCTCCAAGTCATCTCGGTGCT           | GACCTCCTGCCACCTTCTT             | 171bp        |
| G6PD   | NM_001244135 ( <i>Bos taurus</i> ) | Gene expression | CTTTGGCACTGAGGGTCGT             | GCCTGCACCTCTGAGATACT            | 180bp        |
| LPL    | NM_001075120 ( <i>Bos taurus</i> ) | Gene expression | GATGATGCGGATTTTGTAGACG          | GTTGGAAAGTGCCTCCGTTAG           | 121bp        |
| FGF11  | NM_001192939 ( <i>Bos taurus</i> ) | Gene expression | GAACCTCAGCTCAAAGGCATC           | GGTTGAAGTGGGTGAAAGAGC           | 124bp        |
